# Supplementary material
Source: PubMed Central journal article supplement (PMC5508595)
Supplement: NIHMS876982-supplement-1.pdf [file NIHMS876982-supplement-1.pdf]

**Supplemental Table 1. Primer sequences used to create a tiling array across the 300 kb IFNG locus for ChIP assays.**

| IFNG locus primers        |                        | IFNG locus primers         |                        |
|---------------------------|------------------------|----------------------------|------------------------|
| FORWARD                   | REVERSE                | FORWARD                    | REVERSE                |
| 1 GAAGTGAGGACTGGAGTGTCTG  | TGTGTCTCCCATAGCATTTC   | 51 GAGCCTCATGACTCAGACTGG   | TGAGGAGAGGAGAGGGAAGAG  |
| 2 TTTGTGTTGAGGACAGGAACC   | TTGGGCTCCTACGGATTTACT  | 52 TGCATTACACACCATGCATCTT  | TTGGGCATCCTGTAAGTTG    |
| 3 GAGAAATGCCAGCAAAAAGT    | AATGTTCTCACCCCTCGTTGTG | 53 AGAGAAAAGCCAGGCCTAAGTG  | CCCTTCTCTTGTGATTCTCC   |
| 4 AGTGCTGAGGGATTTAGACA    | GTA AAAAGCCCCAGAACCTTG | 54 CTGGTAAAATGGAAGCACAT    | ATGGAGTCGCTATCTGGAGT   |
| 5 CACAGAATGCCCAGTTTCATTG  | GTAGGAGATCCCCACAACAT   | 55 CCCTTCTCTTCTCAAGCTGTT   | GGTGGCATCTAGTCCTTTTG   |
| 6 TGCCAGAAAAGAAAAGAACGAG  | AATTGGCTCACAATTGACCCAC | 56 CAATAAATGAGGCGGCATAAA   | TCAGGATATCTTGTGGCCTGT  |
| 7 GCGTGAGTCAGTGAACCTCTC   | TATGCACGTGTGTGCTCTCTC  | 57 TCGTGGTTTTATTTGTCCAG    | CCATCGTGACAGACTTCCAAT  |
| 8 CCGAGGCTATGTTGGTTTGT    | CAACTGCAATCGAGATCCCTA  | 58 CCCGCAATTTGACTACAAGCTC  | GGCTATGCAGTGGTTGTCAT   |
| 9 AACTTGTCTGGATGCTTGAAT   | TCTTCCACTCTTTCCCATC    | 59 CAGCATCTGACTCCTTTTTCGA  | TGTCCAACGCAAAGCAATAC   |
| 10CCATCATTTTTCCAGTTTCAA   | GGAAGGCAGCATGTTATGAGA  | 60 GGCACCACTGGATTAGAAACA   | TGCCTCTCACTCCTCTCATGT  |
| 11CATTTCATTTCAGGGGAGTTA   | TGCCTTCTTTGTTGAGGCTAA  | 61 GTGGTTGGGAACAAGTAAAA    | TCTTTCTTGGCTTTCTGGTCA  |
| 12AGCACATTTGAGAAGAAAGGAAG | GCCTGCATTGTGAGCTAAAAAG | 62 CCCGCAATTTGACTCATAAAA   | TGAACCACTCCTCAAAAATGG  |
| 13TAGAAGCCCACTAAGTCTAA    | CCCTTCAAAGACTTTCCCAAC  | 63 TCTTGCTGTCCGGAGACTTTAC  | TTGGGCCACAAAGTATCAAA   |
| 14TCCTTTGCTCTTACCAAGAA C  | TTCATGGGTGAGTTTTCCA    | 64 AAATCTGGATTTGGCTCCAGT   | AGCACTGTGGCAGCTGTTAAT  |
| 15CAATGGCTTCTCATTCTCTGA   | TGGTGGGAGTTGCTAGAGGT   | 65 AAAGAACCCAAGAATGGGAAA   | CCACAGGCCAATAGAACAGAA  |
| 16ATCAGAGGTGAATGCATTTGGT  | GCTCTGGCATGAGTAGAAT    | 66 GGCATCTGCTGGCAGCAAT     | CCCTATGGATTTTGGGTTCAAT |
| 17CCTGACACACGTCATCTTGAA   | CAAACATTCCGAAGCCATTTA  | 67 TCAGAGAATCCAGAGCAGGAA   | TGTGCACAGAAAAGTGGAGATG |
| 18CCTACCTGAGCCAGCTCCTAT   | GGTAGAGGGGAAAAACAGCAG  | 68 CACTTTTCACCCACCTTTGAA   | ATACCAGATGGGAAACATCC   |
| 19GCAGTTTTGGTGGGATAGACA   | CTCACTGCCACCATATCCACT  | 69 ATGGGGAGAAAAGTTCCACAC   | TGGAGTTTACGCTCCACAAAAC |
| 20ATAGCAGGTGAATGCATTTGGT  | ACATATCAGATGAGCCCTGAG  | 70 AGGCATCTGCTGGCCATTTT    | GGGAATAATTTTGGGTTCAAT  |
| 21AGTGAGCAGAGGTTTACAGAGA  | TCCCCAAAGCAGGCTATAAAT  | 71 GCGAGAATCATCTCAAAAACA   | CATGCAGCAGAAGTTTTGTCA  |
| 22CTCCTGGGAACTCCTGCTTT    | GTGCTTAGAGGTGCAGACCAG  | 72 CTGCAAGAATGTGCTGATGAA   | ACTCAATTGCTAGGGCCATTT  |
| 23AGCCTCCTTAAATGGCTTTACAA | TGGCATTGGGGAATAGAAA    | 73 GTGAGTGTGCTTTTCGTCCTT   | TAACCTGCCACAGATACCAG   |
| 24GAACCAAGGACTCAGACAACA   | CTTTTCTGCTGTGTGGAGAG   | 74 TCAAGCACAAAAACTGTGC     | TCACCATCGTGAAAAATCA    |
| 25ATCTCTTTCCCCCTTCAA G    | CCCATGTAATCACAGCAGTT   | 75 GTGCCCTTGGCAGCTGCTTACT  | ATCTGCCATCTTACTGGACCT  |
| 26ATGTTGAGCCATCTTTCATCC   | TGAACATGCATCCAGGAAC    | 76 TTCCTGCCTTAAAACTCTGGT   | AAGGAAGGGTATCTGCCTGAA  |
| 27GCAGTTGTGTGGTGTGAGTG    | AGACTCCTCAGCAAAATGCAAA | 77 TGATGGCTAAAGCAAAAATGG   | CTTTGACTCCACTGGACTTCG  |
| 28AATCTGTGCAGCTCTGTGGTT   | GCCTGAGAAATTTGTGCTTTTG | 78 TGGTCAAACCTGCTCTGTTCCA  | GGGGCATACTCAGAACAACT   |
| 29CTCTGGAGAAGCCCAAGAAAG   | TCATCTCTCATCTCCCCACAC  | 79 CCACCATGCTCAGCCTATTTATT | CTGACCTTGTGATCCATCC    |
| 30GCCACTTAAGGAGCGAAAAC    | GGTGGTGGTCTTACACATCT   | 80 GGGAAATCCAGTCTTTGGAG    | TCTAAGGTACCTGCCTTTTGG  |
| 31GGCATCAAATCAAAGAGCAAA   | GCTTGAAAAGCTTCCCTCAGT  | 81 AGGTGGATAGGACCAGTTGCT   | CACCAGCCCACTATTGAACAT  |
| 32TGTGTGAAGCTCTGTACGTC    | GGTCCAGCTAGTCTGATCCT   | 82 AATTTGGGTTACGGAGCACTT   | GGCATCATGGTCACTGAGACT  |
| 33TTTGTGGGGGTTCTCTTTCT T  | AAAAAGGATGGTGGCCTCTT   | 83 GGGGGCTGTGTCATAAATTTTC  | CCATTTCTACCCCTTGTTA    |
| 34AGTTGTTTGGATTGGCTGTTGT  | TCCATACCCAACAATGTGGT   | 84 CTCTCTGATGGCCAGTGTAG    | AAAAAGCGGTGTCACTGAAGA  |
| 35CACTCAATCTCAGGCTTGTCC   | ACATGCACACAAGCACACACT  | 85 TTCCTCTTAGCCAGCAAAA     | AACACTCTTAGGGCAGCAAAA  |
| 36TGTGCTCATGTGAAGTCAGC    | AGCCAGAAATTTCCAATGTTT  | 86 TCTAAGCCCAAAAGTCAGCAAA  | CTCCTTCTTCTCAGCCCTTA   |
| 37TTTCGTGTGCTTGTCTTTCT    | CCACAGATTTTGAACCTGGA   | 87 ATCCCATAGAAACGGAATGC    | ACCGAGGAGATTCACTGGATT  |
| 38TGATAGTGGGGTAGTGTTG     | CAAACGTGTGCATGACAGGAA  | 88 TGGAGACTCATTTGGAAAAGG   | ATGCTGAGAGGCCTGATGTT   |
| 39TTCCTGGAGCACATCAAATTCG  | GCATTCTCTGTGGTTTGTGT   | 89 AGTGGATGATTGCCATGAGAG   | CATGCAAGCCCAATACTTGAT  |
| 40ATCAGAGGCAGGAGAGGGTAG   | ACCCTCCAACCTGGTTCCATAA | 90 TGAAGATGAACCCCTTTTCT    | GCTGTGTTTTGGGGAGTCATA  |
| 41GGAGAATTTTGGGACTTCTCTG  | CCCTTTATCCTCTGCTCCATC  | 91 ACAAGAGAACTGGGCTTCAACA  | AAAAAGCGTTTCTTCTGAGC   |
| 42GGATCAAACAGACAAGCAAGC   | TAGTGTGCGGCAGCTAAGTTT  | 92 TAGCCCCCAGGATACTGACTT   | TGTGGTGGTTAGGTCGTTCTC  |
| 43GGCAGGAGCATAAGGAAACTC   | GTCTCCATCCATTTCTGGTT   | 93 ACAGTGCCTGGCATATAGTGG   | AGAATGCATTTCCAGTCATGG  |
| 44CAATTTGAAAAGCCATGCAAT   | ATCAAGGGAGAAAACAGGAGGA | 94 CCGTGATTCTTGGTGTGTCT    | CGTGAGGGTGTAGCAAAATGTT |
| 45CACATCCTGAAGGAAAGACCA   | TGGCTCTTCTCTCAAACAAA   | 95 GCTTCTTCTCTGCTCAGTTT    | ATGTCCTGGGTTTTGTCCA    |
| 46TTGGCCTCAGTTGTATTACGG   | AAATAGACCTCTGCCCTCTG   | 96 GAGCAAAAACCATGGAATGAAA  | AAGGTGGAGGCTGAGAAGAAG  |
| 47TTTGAGGATTTGGAAGCTTGA   | CTGGAAAGCAACTGACCAGAG  | 97 GGCAACAGAGTGAGATTCTGC   | GAGGGTCAGGATAGGGTTGAG  |
| 48CACTATCCATCCAGTGGCCTA   | AAATAAGCAAAGGAGGCCAAA  | 98 GCCATTGATGGTAGAACAGA    | AGGGCCATATCTTTTGCAGTT  |
| 49TATAAGACAGGCCCTGGTGGTG  | ATTGCCTGGTAAAGCTGTCTT  | 99 GGACACAGACCAAGAAGTCA    | TTTCGACACCTTCAATCCATC  |
| 50CCAATGGGTTTTGGTATGTTGG  | CTCCTGAATGACCAGTGAAG   | 100 AACGAAAATGAAAAGCCATGTG | GTGCTGGGATTATAGGCATGA  |
|                           |                        | 101 CTCTATCGGCTCAGACACAGG  | GGCAGTTTATCTCAACCACA   |
|                           |                        | 102 GTGTGCATGTGAGTGAGGCTA  | TCACACGGGATTAATTTGCTC  |

**Supplemental Table 2: Primer sequences used to determine expression levels of the indicated genes and novel lncRNA loci.**

| <b>ID</b>            | <b>FORWARD</b>           | <b>REVERSE</b>         |            |              |             |  |
|----------------------|--------------------------|------------------------|------------|--------------|-------------|--|
| GAPDH                | AGCCACATCGCTCAGACAC      | GCCAATACGACCAATCC      |            |              |             |  |
| IFNG-AS1-1           | ATACACGTTTCGAGCATGGGG    | CGGGAAAATTGCCAGTGTGC   |            |              |             |  |
| IFNG-AS1-2           | TGTGGGTCCAATGTGAAAAACAC  | TCCAGCTGGTTGTTAGCAGT   |            |              |             |  |
| IFNG-AS1-3           | GTGCTCTCTGATGGTGGGAA     | TGATTCAGGGCACAACCCAT   |            |              |             |  |
| <b>ID</b>            | <b>FORWARD</b>           | <b>REVERSE</b>         | <b>CHR</b> | <b>START</b> | <b>STOP</b> |  |
| BACH2-lncRNA-1       | GAGCTCTCTTCAGTGGTGGT     | GTGTTGGGCTGTTGTGCTAT   | chr6       | 90697099     | 90697834    |  |
| BACH2-lncRNA-2       | AATCACACCACAGCAATCGG     | CTTCCCATTCGCGATTACACA  | chr6       | 90791372     | 90792598    |  |
| BACH2-lncRNA-3       | GTGACTGCTGGTTTGATGCT     | GGGAGAGGAAAGTAAGGGCT   | chr6       | 90793946     | 90794392    |  |
| BACH2-lncRNA-4       | GACAAAGTGGCAAAGAGGGG     | CACCTCTCCACACACACCTA   | chr6       | 90813143     | 90814020    |  |
| BACH2-lncRNA-5       | GTGGGTGGCGCTGATTAAT      | TTCCTCTGGTTGCCCTGTAG   | chr6       | 90816308     | 90817377    |  |
| BACH2-lncRNA-6       | CCTCCTGACACAGCCAACTA     | GAGAAGTGTAGCCGAGGGTT   | chr6       | 90844729     | 90845780    |  |
| BACH2-lncRNA-7       | CCAGTGAAGCCAGGAAGAGA     | TGACATGCAGTGGAGGGATT   | chr6       | 90846651     | 90848027    |  |
| BACH2-lncRNA-8       | ATAAGTCAGGGCAAGCAGT      | ATGGACTGCACCCCTTCTCA   | chr6       | 90848147     | 90850657    |  |
| BACH2-lncRNA-9       | TGTGCAGCATCCAGAGAGAA     | CCTTTGGCTCTGCACTTTGT   | chr6       | 90865580     | 90867122    |  |
| BACH2-lncRNA-10      | ATCTCTCTGTGCACGTGAGG     | CAGCCACACATGCACATAC    | chr6       | 90868552     | 90870150    |  |
| BACH2-lncRNA-11      | AAATTCTCAGTGTGGGGCG      | TCTCTGAGAATCGGCTAGCC   | chr6       | 90884515     | 90885507    |  |
| BACH2-lncRNA-12      | TCTGACACCATTGCCTACGT     | GCAGAACCAGAAACCCCATG   | chr6       | 90886819     | 90887907    |  |
| BACH2-lncRNA-13      | GAGAGTGTGCCCTAATCCA      | GGACTGTGAGGCAAGGATCT   | chr6       | 90899886     | 90903313    |  |
| IFNG-locus-lncRNA-1  | TTCTGCTCCCACTCATTTCC     | GAGCAATGGACAACACTGGTT  | chr12      | 68390041     | 68390726    |  |
| IFNG-locus-lncRNA-2  | CAAGCATAAAGACCCAATGAAA   | TTTTATGTGGCCACTCGTCA   | chr12      | 68391234     | 68391743    |  |
| IFNG-locus-lncRNA-3  | AATGGGAGAGAAGGGAAAGC     | TGCCAGACTGCTCCACTGTA   | chr12      | 68392820     | 68394049    |  |
| IFNG-locus-lncRNA-4  | AGAGACCCAAAGGGGTTGAG     | TTGTGATCTGAGGGCACACT   | chr12      | 68419260     | 68420217    |  |
| IFNG-locus-lncRNA-5  | GGCCATTTGCACTAAGTGGT     | TGAATGTGGATGAGGCTGA    | chr12      | 68420019     | 68422688    |  |
| IFNG-locus-lncRNA-6  | ACACACACACACGGCAAAT      | TTCTACTTCTGGCTGCAGAT   | chr12      | 68423989     | 68424632    |  |
| IFNG-locus-lncRNA-7  | GAGGCATAGGAATGGTGGAG     | CATTTTGGGGGAATACAGTTG  | chr12      | 68427403     | 68427873    |  |
| IFNG-locus-lncRNA-8  | CTCAACACCTCCCAGAGAGC     | GGGTGATGGGAGACAATGAC   | chr12      | 68437140     | 68438022    |  |
| IFNG-locus-lncRNA-9  | TTCTGTGGTTGTTGGTTGGA     | AAGACTTTGGCAGCAACACA   | chr12      | 68459426     | 68460006    |  |
| IFNG-locus-lncRNA-10 | TGCCTCAAGCTGAACACAAA     | CAAGCATGCCTGTACTTGTGA  | chr12      | 68465400     | 68465978    |  |
| IFNG-locus-lncRNA-11 | GGCTCATTCTGGATTCTCA      | TGCAATGATAGCCAACCAAG   | chr12      | 68481171     | 68481617    |  |
| IFNG-locus-lncRNA-12 | TTCAGATGCAAAGAGGCAAG     | CACCTTTGTCAGGAGGAGGA   | chr12      | 68504068     | 68504288    |  |
| IFNG-locus-lncRNA-13 | GTAGAATGACTTTGGAAGTATTCC | GAAAAAATGAACAAATTCCTAG | chr12      | 68522144     | 68522384    |  |
| IFNG-locus-lncRNA-14 | GCCCAGTTCCTGCAGAGTAG     | AGACATGGCAACAGGTCTCC   | chr12      | 68549554     | 68551487    |  |
| IFNG-locus-lncRNA-15 | AAGGAGACAATTTGGCTCTGCATT | GTGAATATTGTACATCTGAGTT | chr12      | 68551834     | 68552138    |  |
| IFNG-locus-lncRNA-16 | TGAATGAGTTCCCACCACAA     | GGCAGTCATTTTGTGATTTGG  | chr12      | 68552711     | 68553271    |  |
| IFNG-locus-lncRNA-17 | CATGGCCAAGCACAGAATTA     | TTGATAGATTGGGGATGGA    | chr12      | 68555523     | 68557219    |  |
| IFNG-locus-lncRNA-18 | TTATGTCCCATGTGCCCTTT     | CCAGTGTCTGGTTGCTCTGTA  | chr12      | 68562339     | 68563325    |  |
| IFNG-locus-lncRNA-19 | TGAGGATCCTGTCTTCTTTGAGA  | GGAGCCTGGACTCAAACCTCA  | chr12      | 68570241     | 68570791    |  |
| IFNG-locus-lncRNA-20 | AGCTTTAAGGGGAAGGCAAA     | AAGCAGGATTGTGGGATCAG   | chr12      | 68590084     | 68590683    |  |
| IFNG-locus-lncRNA-21 | GTCTCTCAACCCTGCTGAGG     | ATGTTTTGTCTGGCCGTCTC   | chr12      | 68592719     | 68593898    |  |
| IFNG-locus-lncRNA-22 | AATGCCTCTGCTTTGGTTTG     | CCCATGTTTTGAACGTCCTT   | chr12      | 68620439     | 68621987    |  |
| IFNG-locus-lncRNA-23 | AACCATTGTCATCCCACAGAAA   | TTAAAGGTGGGATGCGTGA    | chr12      | 69060771     | 69061321    |  |
| IFNG-locus-lncRNA-24 | GAGAACATTTGCAGGGGAAC     | TGACATGTTTTGGCTCTGTC   | chr12      | 68478586     | 68478959    |  |
| IFNG-locus-lncRNA-25 | GGATTTAGCGAGGGCTCTTC     | AGAAACGCCTTCAAATGTGG   | chr12      | 68590993     | 68591368    |  |
| IFNG-locus-lncRNA-26 | CTCCCCTCTCCCTGCTACTT     | GCTCCAGAACAATTGCCAAA   | chr12      | 68614771     | 68615283    |  |

**Supplemental Table 3. Sample data and calculations used to construct figures 2 and 3**

| NAIVE           |               |                           | FPKM (mean) |      |       | Genes next door | STRAND +/- | R    | P       | genes away | kb away |
|-----------------|---------------|---------------------------|-------------|------|-------|-----------------|------------|------|---------|------------|---------|
| Gene id         | gene name     | locus                     | Tm          | Tem  | Tem   |                 |            |      |         |            |         |
| ENSG00000259062 | ACTN1-AS1     | 14:69,446,399-69,454,180  | 1.33        | 0.04 | 0.00  | ZFP36L1         | -          | 0.11 | NS      | 1          | 184     |
|                 |               |                           |             |      |       | <b>ACTN1</b>    | -          | 0.87 | 0.0003  | 0          | 0       |
|                 |               |                           |             |      |       | <b>DCAF5</b>    | -          | 0.87 | 0.0003  | 1          | 71      |
|                 |               |                           |             |      |       | EXD2            | -          | 0.26 | NS      | 2          | 212     |
| ENSG00000234773 | CTD-2666L21   | 19:12,305,830-12,318,512  | 2.08        | 0.11 | 0.29  | <b>ZNF433</b>   | -          | 0.48 | 0.04    | 5          | 160     |
|                 |               |                           |             |      |       | <b>ZNF844</b>   | +          | 0.53 | 0.04    | 4          | 118     |
|                 |               |                           |             |      |       | ZNF20           | -          | 0.07 | NS      | 3          | 55      |
|                 |               |                           |             |      |       | ZNF44           | -          | 0.11 | NS      | 0          | 0       |
|                 |               |                           |             |      |       | <b>ZNF563</b>   | -          | 0.72 | 0.003   | 1          | 122     |
|                 |               |                           |             |      |       | <b>ZNF442</b>   | -          | 0.5  | 0.03    | 2          | 170     |
|                 |               |                           |             |      |       | ZNF799          | -          | 0    | NS      | 3          | 194     |
| ENSG00000259863 | SH3RF3-AS1    | 2:109,743,783-109,745,386 | 0.52        | 0.08 | 0.05  | <b>EDAR</b>     | +          | 0.79 | 0.001   | 1          | 139     |
|                 |               |                           |             |      |       | <b>SH3RF3</b>   | -          | 0.91 | <0.0001 | 0          | 0       |
| ENSG00000246859 | STARD4-AS1    | 5:110831730-111353006     | 0.53        | 0.03 | 0.11  | <b>CAMK4</b>    | +          | 0.48 | 0.04    | 1          | 12      |
|                 |               |                           |             |      |       | STARD4          | -          | 0.08 | NS      | 0          | 0       |
|                 |               |                           |             |      |       | <b>NREP</b>     | -          | 0.96 | <0.0001 | 0          | 0       |
| ENSG00000257495 | RP11-641A6.2  | 12:53,005,072-53,007,846  | 2.92        | 0.53 | 0.33  | <b>KRT72</b>    | -          | 0.8  | 0.001   | 0          | 0       |
|                 |               |                           |             |      |       | <b>KRT73</b>    | -          | 0.9  | <0.0001 | 0          | 0       |
|                 |               |                           |             |      |       | <b>KRT2</b>     | -          | 0.88 | 0.0002  | 1          | 33      |
| ENSG00000236703 | MYB-AS1       | 6:135,516,221-135,517,133 | 0.63        | 0.07 | 0.14  | HBS1L           | +          | 0.19 | NS      | 1          | 145     |
|                 |               |                           |             |      |       | <b>MYB</b>      | -          | 0.7  | 0.005   | 0          | 0       |
|                 |               |                           |             |      |       | AHI1            | +          | 0.22 | NS      | 1          | 89      |
| ENSG00000224533 | TMLHE-AS1     | X:154,576,450-154,603,823 | 1.47        | 0.19 | 0.32  | BRCC3           | -          | 0.05 | NS      | 3          | 225     |
|                 |               |                           |             |      |       | VBP1            | -          | 0.39 | NS      | 2          | 108     |
|                 |               |                           |             |      |       | <b>F8A1</b>     | -          | 0.67 | 0.007   | 1          | 130     |
|                 |               |                           |             |      |       | <b>F8A3</b>     | +          | 0.73 | 0.003   | 2          | 155     |
|                 |               |                           |             |      |       | <b>F8A2</b>     | -          | 0.73 | 0.003   | 3          | 162     |
| ENSG00000249236 | CTD-2227I18.1 | 5:55,354,877-55,363,199   | 1.40        | 0.20 | 0.29  | <b>IL6ST</b>    | -          | 0.78 | 0.002   | 1          | 124     |
|                 |               |                           |             |      |       | <b>ANKRD55</b>  | -          | 0.89 | 0.0001  | 0          | 0       |
| ENSG00000268496 | CTD-2587H19   | 19:54,945,363-54,945,845  | 0.67        | 0.10 | 0.16  | RPS9            | +          | 0.78 |         | 2          | 230     |
|                 |               |                           |             |      |       | <b>LAIR1</b>    | -          | 0.82 | 0.0008  | 1          | 63      |
|                 |               |                           |             |      |       | <b>TTYH1</b>    | +          | 0.67 | 0.007   | 0          | 0       |
|                 |               |                           |             |      |       | <b>LENG8</b>    | +          | 0.85 | 0.0004  | 1          | 15      |
| ENSG00000232021 | LEF1-AS1      | 4:108968700-109177992     | 21.17       | 6.12 | 3.92  | CYP2U1          | +          | 0.4  | NS      | 2          | 95      |
|                 |               |                           |             |      |       | <b>HADH</b>     | +          | 0.82 | 0.0009  | 1          | 13      |
|                 |               |                           |             |      |       | <b>LEF1</b>     | -          | 0.98 | <0.0001 | 0          | 0       |
| MEMORY          |               |                           | FPKM (mean) |      |       | Genes next door | STRAND +/- | R    | P       | genes away | kb away |
| Gene id         | gene name     | locus                     | Tm          | Tem  | Tem   |                 |            |      |         |            |         |
| ENSG00000224950 | RP5-1086K13   | 1:116966345-117113661     | 0.05        | 0.19 | 0.72  | ATP1A1          | -          | 0.1  | NS      | 1          | 20      |
|                 |               |                           |             |      |       | <b>CD58</b>     | +          | 0.69 | 0.006   | 0          | 0       |
|                 |               |                           |             |      |       | <b>CD2</b>      | -          | 0.44 | 0.049   | 1          | 184     |
| ENSG00000236213 | AC006369.2    | 2:37827278-37965611       | 0.06        | 0.88 | 2.04  | <b>CDC42EP3</b> | -          | 0.82 | 0.0008  | 0          | 4       |
| ENSG00000230747 | AC021188.4    | 2:96973000-96987469       | 0.16        | 0.70 | 1.99  | <b>DUSP2</b>    | +          | 0.44 | 0.04    | 5          | 161     |
|                 |               |                           |             |      |       | <b>STARD7</b>   | -          | 0.5  | 0.03    | 4          | 70      |
|                 |               |                           |             |      |       | <b>TMEM127</b>  | +          | 0.41 | 0.04    | 3          | 41      |
|                 |               |                           |             |      |       | CIAO1           | -          | 0.09 | NS      | 2          | 34      |
|                 |               |                           |             |      |       | <b>ITPRIPL1</b> | -          | 0.83 | 0.0006  | 0          | 0       |
| ENSG00000238057 | ZEB2-AS1      | 2:145,277,181-145,278,465 | 0.04        | 0.02 | 0.76  | <b>GTDC1</b>    | +          | 46   | 0.03    | 1          | 225     |
|                 |               |                           |             |      |       | <b>ZEB2</b>     | +          | 0.98 | <0.0001 | 0          | 0       |
| ENSG00000253519 | AC106801.1    | 5:156,992,972-156,996,106 | 0.02        | 0.60 | 1.21  | <b>CYFIP2</b>   | +          | 0.45 | 0.04    | 2          | 171     |
|                 |               |                           |             |      |       | <b>FNDC9</b>    | -          | 0.68 | 0.006   | 1          | 221     |
|                 |               |                           |             |      |       | <b>ADAM19</b>   | -          | 0.78 | 0.002   | 0          | 0       |
| ENSG00000272053 | RP11-367G6.3  | 6:25,015,180-25,042,398   | 0.22        | 1.95 | 2.59  | <b>FAM65B</b>   | -          | 0.6  | 0.01    | 0          | 211     |
|                 |               |                           |             |      |       | <b>CMAHP</b>    | -          | 0.48 | 0.02    | 1          | 39      |
| ENSG00000269919 | RP1-134E15.3  | 6:106,548,015-106,548,468 | 0.71        | 5.11 | 12.03 | <b>PRDM1</b>    | -          | 0.8  | 0.001   | 0          | 0       |
|                 |               |                           |             |      |       | ATG5            | -          | 0    | NS      | 1          | 22      |
| ENSG00000273038 | RP11-479G22   | 10:33,176,189-33,178,239  | 0.36        | 3.58 | 4.72  | CCDC7           | -          | 0.02 | NS      | 1          | 5       |
|                 |               |                           |             |      |       | <b>ITGB1</b>    | -          | 0.92 | <0.0001 | 1          | 6       |
| ENSG00000233387 | RP11-342D11   | 10:33,385,185-33,405,600  | 0.11        | 1.82 | 4.21  | CCDC7           | +          | 0.08 | NS      | 2          | 214     |
|                 |               |                           |             |      |       | <b>ITGB1</b>    | +          | 0.84 | 0.0005  | 1          | 138     |
| ENSG00000261438 | RP11-399O19   | 10:90,775,593-90,776,816  | 0.23        | 0.91 | 2.08  | STAMBPL1        | +          | 0.16 | NS      | 2          | 93      |
|                 |               |                           |             |      |       | <b>FAS</b>      | +          | 0.7  | 0.005   | 0          | 0       |
|                 |               |                           |             |      |       | LIPA            | -          | 0.01 | NS      | 1          | 197     |
| ENSG00000256427 | RP11-118B22   | 12:9,399,093-9,410,556    | 0.13        | 0.90 | 2.09  | <b>KLRG1</b>    | -          | 0.79 | 0.001   | 3          | 236     |
|                 |               |                           |             |      |       | <b>A2M</b>      | +          | 0.79 | 0.001   | 2          | 130     |
|                 |               |                           |             |      |       | <b>PZP</b>      | +          | 0.65 | 0.008   | 1          | 37      |
| ENSG00000122043 | LINC00544     | 13:30510041-30524625      | 0.17        | 0.97 | 1.32  | <b>UBL3</b>     | -          | 0.87 | 0.0003  | 1          | 86      |
| ENSG00000259482 | RP11-219B17   | 15:60,973,768-60,979,087  | 0.03        | 0.56 | 0.22  | NARG2/ICE2      | +          | 0.01 | NS      | 1          | 203     |
|                 |               |                           |             |      |       | <b>RORA</b>     | +          | 0.75 | 0.002   | 0          | 89      |

Neighboring expressed protein coding genes are indicated and whether they are transcribed in sense (+) or antisense (-) relative to the lncRNA. R=correlation coefficient, P is probability that the regression line is non-zero. Genes away and kb away are distance in number of genes or kb between protein-coding genes and lncRNA genes.

| # of lncRNAs | Gene (Tn) | # of lncRNAs | Gene (Tcm) | # of lncRNAs | Gene (Tem) |
|--------------|-----------|--------------|------------|--------------|------------|
| 4            | SLC12A2   | 6            | ITM2A      | 5            | CD58       |
| 4            | ZNF746    | 6            | JMJD1C     | 5            | BNIP3L     |
| 4            | PFKFB3    | 6            | LAMTOR3    | 5            | APBB1IP    |
| 4            | KRBA1     | 6            | LPP        | 5            | FOXJ3      |
| 4            | S100B     | 6            | MTMR1      | 5            | PREX1      |
| 5            | SGK223    | 6            | N6AMT2     | 5            | AHR        |
| 5            | CD247     | 6            | NBAS       | 5            | PRDM1      |
| 5            | RAPGEF6   | 6            | PPP2R2A    | 5            | EPC1       |
| 5            | RGCC      | 6            | RAD51B     | 5            | USP25      |
| 5            | INPP4A    | 6            | SIRT1      | 5            | INPP5D     |
| 5            | SCML4     | 6            | SLC24A1    | 5            | HERC4      |
| 5            | NAA16     | 6            | SNX13      | 5            | KMT2E      |
| 5            | ZZZ3      | 6            | SRSF11     | 5            | ATP1A1     |
| 5            | SYNRG     | 6            | TLK1       | 5            | ELOVL5     |
| 5            | TM9SF2    | 6            | USP20      | 5            | IFI16      |
| 5            | RNF144A   | 6            | XPO4       | 5            | FYN        |
| 5            | C1GALT1   | 6            | ZFP36L1    | 6            | TOX        |
| 5            | COA5      | 6            | ZFY        | 6            | ALCAM      |
| 5            | NIPBL     | 7            | AOAH       | 6            | PAM        |
| 5            | CAMK2D    | 7            | APBB1IP    | 6            | MAP3K8     |
| 5            | BCAS4     | 7            | BCL2       | 6            | SSBP2      |
| 5            | RPIA      | 7            | C5orf42    | 6            | TBK1       |
| 5            | YEATS2    | 7            | CERS6      | 6            | SOS1       |
| 5            | POU2F1    | 7            | ELMO1      | 6            | TSEN15     |
| 5            | C5orf42   | 7            | EMB        | 6            | NSMAF      |
| 5            | ZC4H2     | 7            | EPC2       | 6            | ASAH1      |
| 6            | THEMIS    | 7            | LRRN3      | 6            | PHTF2      |
| 6            | NDFIP1    | 7            | MBD5       | 6            | ATG16L1    |
| 6            | CBLB      | 7            | MPLKIP     | 6            | TNIK       |
| 6            | NDNL2     | 7            | NIPBL      | 6            | CUL3       |
| 6            | FOXJ3     | 7            | PTBP2      | 6            | PHACTR2    |
| 6            | RB1CC1    | 8            | ANK3       | 6            | DENND4C    |
| 6            | TLE4      | 8            | CDK13      | 6            | RASSF3     |
| 6            | AOAH      | 8            | FOXP1      | 6            | ARHGAP25   |
| 6            | FBXL4     | 8            | FUT8       | 6            | CBLB       |
| 6            | CERS6     | 8            | MAML2      | 6            | PRKCB      |
| 6            | ICA1L     | 8            | MTMR2      | 6            | THEMIS     |
| 6            | BMPR2     | 8            | PDSS1      | 6            | PCM1       |
| 7            | IL6ST     | 8            | PIK3R1     | 6            | CNOT6L     |
| 7            | CD47      | 8            | SLC30A5    | 6            | RPS6       |
| 7            | TXK       | 8            | THEMIS     | 7            | EPB41L5    |
| 7            | BBX       | 8            | TNKS       | 7            | DLEU1      |
| 7            | APBA2     | 8            | ZBTB20     | 7            | MCOLN2     |
| 7            | CUL3      | 8            | ZNF638     | 7            | B3GALT2    |
| 7            | DHRS3     | 9            | ARID5B     | 7            | SMYD3      |
| 7            | EIF4E3    | 9            | FIGNL1     | 7            | ZBTB20     |
| 7            | RPAP3     | 9            | IKZF1      | 7            | RNASEH2B   |
| 7            | YIPF4     | 9            | MSRA       | 7            | TIPARP     |
| 7            | AMIGO2    | 9            | PARP8      | 7            | PTPN4      |
| 7            | TNFRSF1B  | 9            | PLCL2      | 7            | CCNL1      |
| 8            | BIRC6     | 9            | RTKN2      | 8            | TRUB1      |
| 8            | SEPN1     | 9            | SLC9A9     | 8            | IL18R1     |
| 8            | PDK1      | 10           | ALCAM      | 8            | PDE4D      |
| 8            | HIVEP1    | 10           | ATP2B1     | 8            | ABLIM1     |
| 8            | ATF1      | 10           | CBLB       | 9            | IL18RAP    |
| 8            | DIP2B     | 10           | ITGA4      | 9            | ZNF644     |
| 8            | PCSK5     | 10           | KIAA0020   | 9            | MAN1A2     |
| 8            | RFK       | 10           | PLCL1      | 9            | BBX        |
| 9            | RANBP2    | 10           | TBC1D5     | 10           | UCK1       |
| 9            | EDAR      | 10           | TSHZ2      | 10           | GATA3      |
| 10           | FOXP1     | 10           | UBE2E3     | 10           | ATXN1      |
| 10           | RBMS1     | 10           | ZNF217     | 10           | GDAP2      |
| 10           | PLCL1     | 11           | CHD7       | 10           | CD47       |
| 10           | CA6       | 11           | TNIK       | 12           | A2M        |
| 11           | MAN1C1    | 11           | ZNF644     | 12           | RAPGEF1    |
| 12           | TBC1D5    | 12           | ARID1B     | 13           | FER        |
| 13           | MAML2     | 12           | ARL15      | 13           | ADHFE1     |
| 13           | FER       | 12           | NDUFS4     | 13           | MYBL1      |
| 13           | MTMR2     | 12           | RFX3       | 15           | CHST11     |
| 18           | RPL34     | 13           | GPHN       | 16           | PARP8      |
| 18           | IGF1R     | 14           | ATXN1      | 21           | FAM129A    |
| 19           | SATB1     | 14           | BTBD9      | 22           | CDC7       |
| 20           | SFMBT2    | 14           | ZFAND3     | 22           | TGFBR3     |
| 21           | LEF1      | 15           | GATA3      | 27           | EDEM3      |
| 23           | PRKCQ     | 18           | GNAQ       | 27           | ERN1       |
| 41           | SSBP2     | 22           | FER        | 27           | ICAM2      |
| 83           | BACH2     | 29           | KLF12      | 28           | KLF12      |

**Supplemental Table 4. Indicated lineage-specific protein-coding genes ranked according to numbers of lineage-specific novel lncRNAs either intragenic or within 20kb of 5' start site or 3' end. For each lineage, the first column is the number of discrete novel lncRNA loci transcribed near the indicated protein-coding gene (second column)**
